# Supplementary material for: Surface science studies of the coverage dependent adsorption of methyl acetate and methyl propanoate on graphite
Source: Royal Society of Chemistry journal article supplement (doi:10.1039/d4ra04466e), 2024-01-01
Supplement: d4ra04466e1.pdf [file d4ra04466e1.pdf]

## Surface science studies of the coverage dependent adsorption of methyl acetate and methyl propanoate on graphite

Jack E. Fulker and Wendy A. Brown

Department of Chemistry, University of Sussex, Falmer, Brighton, BN1 9QJ, UK

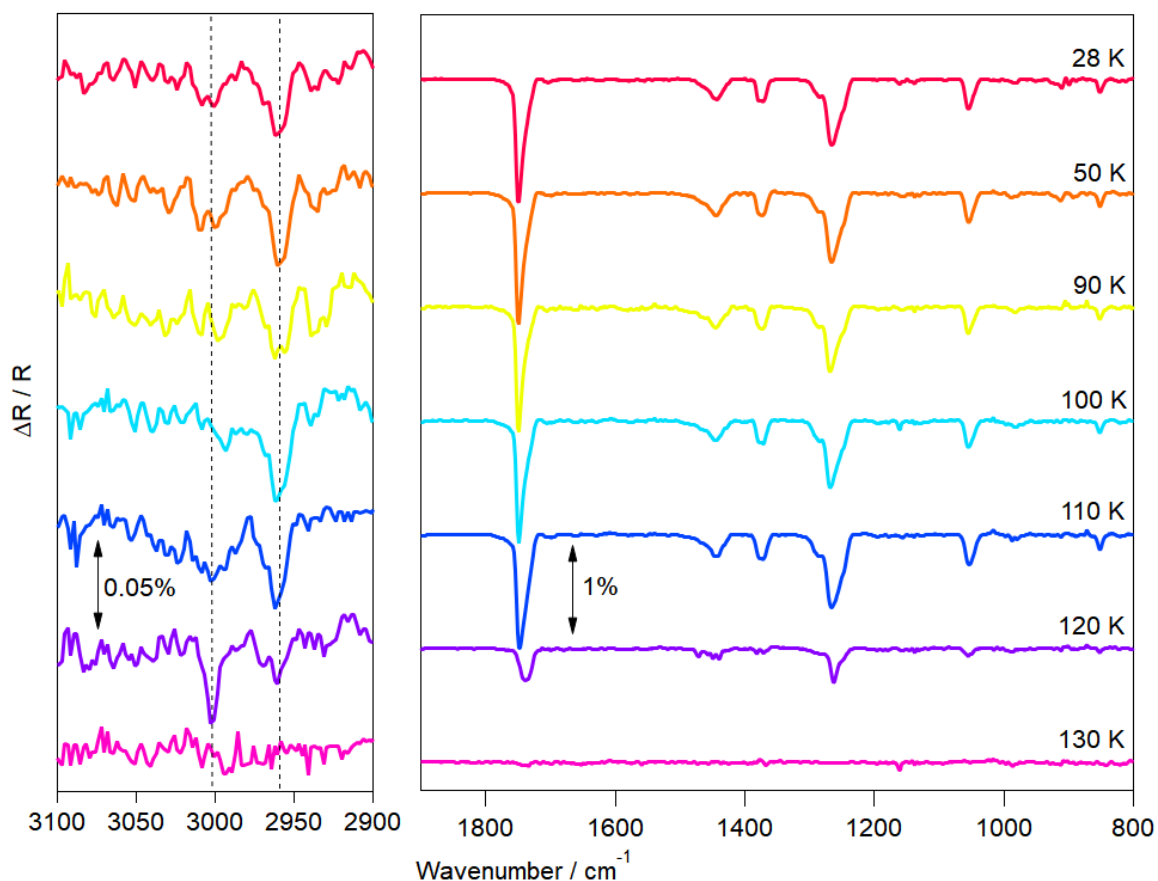

**Figure S1:** RAIR spectra for the annealing of a 100 L<sub>m</sub> methyl acetate ice adsorbed on HOPG. The ice was grown at 28 K and heated at a rate of 0.5 K s<sup>-1</sup> in increments of 10 K, holding at each temperature for 3 minutes before cooling back to base temperature to record a spectrum. The left hand panel shows the 2900 – 3100 cm<sup>-1</sup> wavenumber region and the right hand panel shows the region from 800 – 1900 cm<sup>-1</sup>. No vibrational bands are seen in other regions of the spectrum.

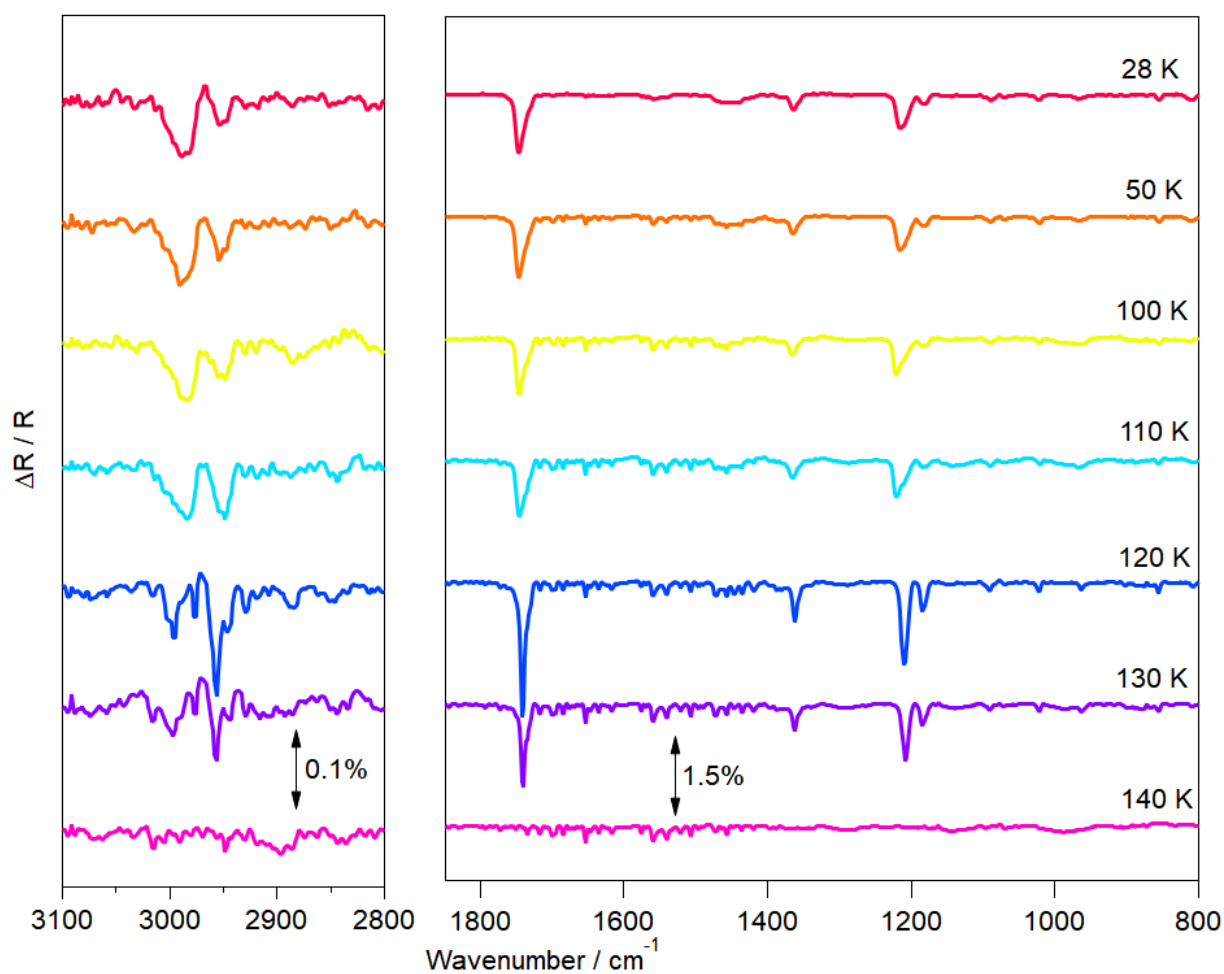

**Figure S2:** RAIR spectra for the annealing of a 100  $L_m$  methyl propanoate ice adsorbed on HOPG. The ice was grown at 28 K and heated at a rate of  $0.5 \text{ K s}^{-1}$  in increments of 10 K, holding at each temperature for 3 minutes before cooling back to base temperature to record a spectrum. The left hand panel shows the 2800 – 3100  $\text{cm}^{-1}$  wavenumber region and the right hand panel shows the region from 800 – 1900  $\text{cm}^{-1}$ . No vibrational bands are seen in other regions of the spectrum.

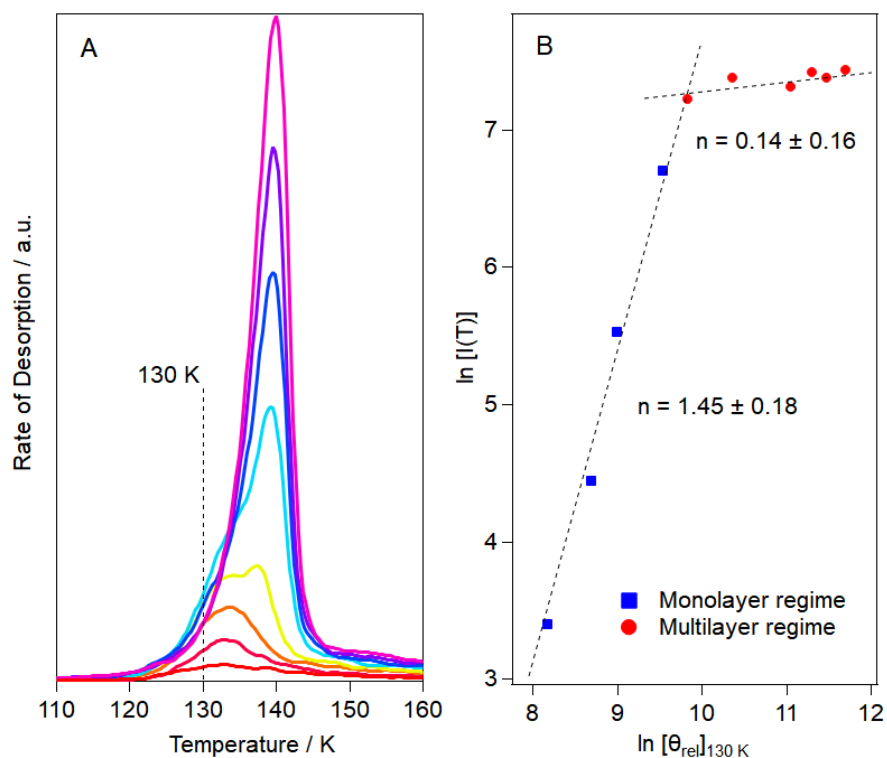

**Figure S3:** (A) TPD data for methyl propanoate adsorbed on HOPG with the common temperature of 130 K labelled. (B) An example order plot for the desorption at 130 K.

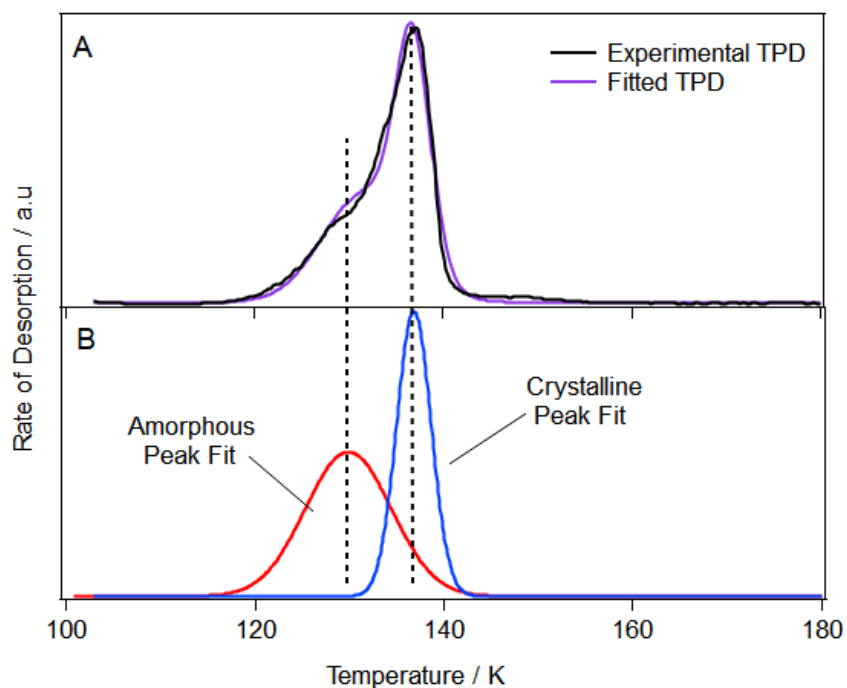

**Figure S4:** An example peak fit for the separation of amorphous and crystalline methyl acetate desorption for a 180 L<sub>m</sub> ice grown at 120 K on HOPG. (A) The experimental data compared to the fitted trace. (B) The separated amorphous and crystalline peaks.

**Table S1:** Molecular constants used in the transition-state-theory analysis.

|                   | Mass / amu | Principle moments of inertia / amu Å <sup>2</sup> |                |                | Symmetry factor ( $\sigma$ ) |
|-------------------|------------|---------------------------------------------------|----------------|----------------|------------------------------|
|                   |            | I <sub>x</sub>                                    | I <sub>y</sub> | I <sub>z</sub> |                              |
| Methyl acetate    | 74         | 163.83                                            | 121.04         | 49.16          | 1                            |
| Methyl propanoate | 88         | 278.46                                            | 235.18         | 52.73          | 1                            |
